# Supplementary material for: Isolation of Artemisia capillaris membrane-bound di-prenyltransferase for phenylpropanoids and redesign of artepillin C in yeast
Source: PubMed Central journal article supplement (PMC6802118; doi:10.1038/s42003-019-0630-0), 2019-10-18
Supplement: 42003_2019_630_MOESM1_ESM.pdf [file 42003_2019_630_MOESM1_ESM.pdf]

**a**

|                |            |
|----------------|------------|
| N75 length     | 587        |
| N50 length     | 1,089      |
| N25 length     | 1,837      |
| Minimum length | 249        |
| Maximum length | 13,155     |
| Average length | 848        |
| Total bases    | 35,531,974 |
| Contig counts  | 41,856     |
| Unigene counts | 39,615     |

**b**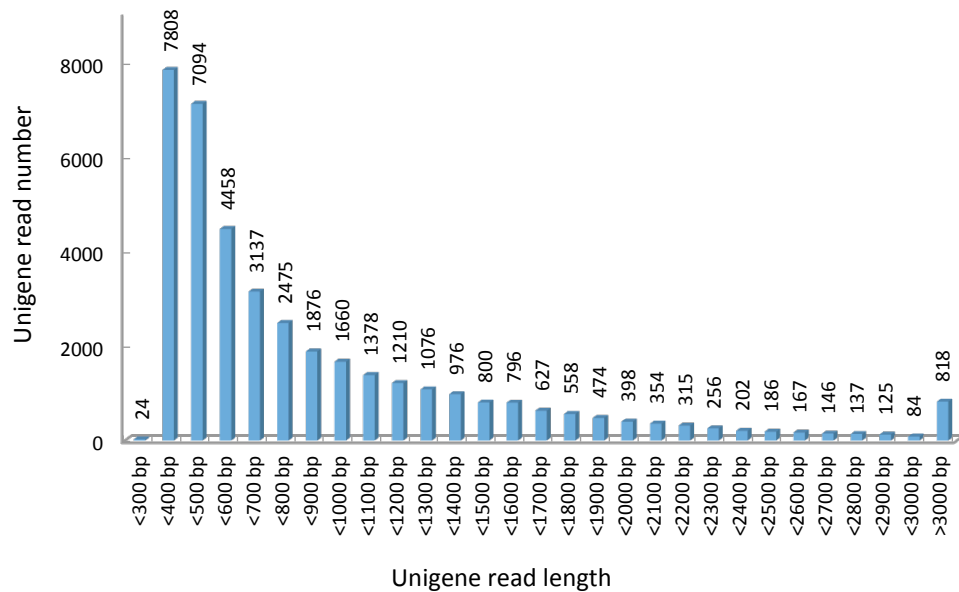**Supplementary Figure 1. RNA-seq data of *A. capillaris* leaves**

- a. Basic information for assembled contigs. A unigene set of 39,615 sequences was generated by TGICL clustering of 41,856 contigs.
- b. Histogram of unigenes by sequence length.

**a**

| <i>A. capillaris</i><br>unigene ID | Query with highest<br>homology | Amino acid<br>identity(%) | Predicted<br>function |
|------------------------------------|--------------------------------|---------------------------|-----------------------|
| 1147                               | HaCOX10                        | 84.1                      | COX10                 |
| 1403                               | LsVTE2-1                       | 94.7                      | VTE2-1                |
| 4037                               | LsVTE2-1                       | 70.2                      | VTE2-1                |
| 4523                               | HaATG4                         | 90.0                      | ATG4                  |
| 5921                               | HaABC4                         | 75.8                      | ABC4                  |
| 6131                               | HaVTE2-2                       | 62.6                      | VTE2-2                |
| 6132                               | HaVTE2-2                       | 61.3                      | VTE2-2                |
| 9515                               | LsVTE2-1                       | 43.5                      | Unknown               |
| 11013                              | HaATG4                         | 95.0                      | ATG4                  |
| 11389                              | HaVTE2-2                       | 84.6                      | VTE2-2                |
| 12392                              | HaVTE2-2                       | 93.6                      | VTE2-2                |
| 14791                              | HaPPT                          | 93.9                      | PPT                   |
| 19105                              | HaCOX10                        | 78.2                      | COX10                 |
| 20817                              | LsVTE2-1                       | 22.1                      | Unknown               |
| 21310                              | HaCOX10                        | 66.6                      | COX10                 |
| 22890                              | HaPPT                          | 31.6                      | Unknown               |
| 22891                              | HaPPT                          | 35.5                      | Unknown               |
| 27493                              | HaCOX10                        | 31.1                      | Unknown               |

**b**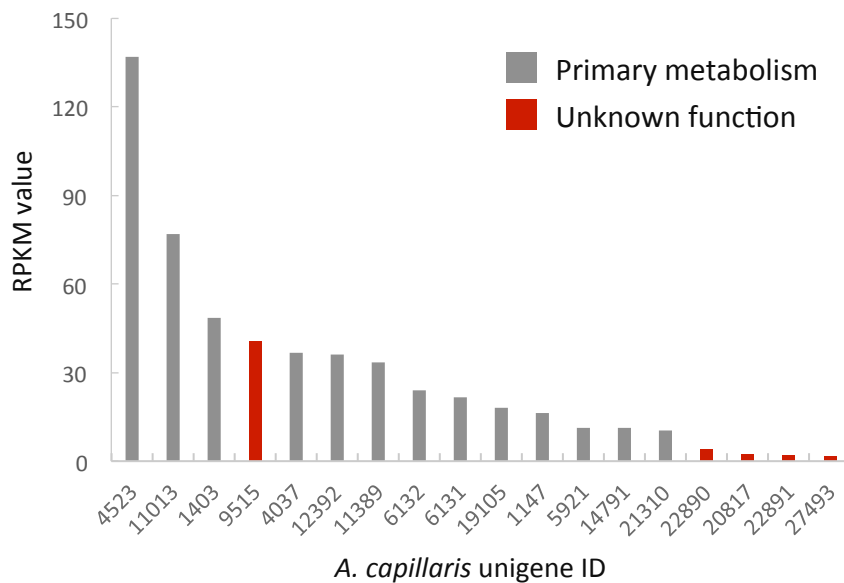**Supplementary Figure 2. *In silico* analysis of the UbiA superfamily in *A. capillaris* RNA-seq unigenes**

**a.** Grouping of unigenes in the UbiA superfamily. Asteraceae proteins belonging to each of six UbiA subfamilies dedicated to primary metabolism (LsVTE2-1, HaVTE2-2, HaABC4, HaATG4, HaCOX10 and HaPPT) were selected as queries. Each unigene was functionally annotated according to the percent amino acid identity with the query protein and assorted relative to highest homology to the unigene. If amino acid identity was higher than 60%, the unigene was predicted to have the same function as the query. Unigenes showing amino acid identities lower than this threshold were selected as candidates possessing unknown functions. Unigene9515 contains the full CDS of *AcPPT1*.

**b.** RPKM values of UbiA unigenes (n = 1). Unigenes predicted to be related to primary metabolism and to have unknown functions are highlighted in gray and red, respectively.

**a**

**Predicted transit peptide**

MASLTVGSLC KPTSNGLSIL VTSSSSLSTG AHASNFLRIS KVENNWSAQF 50  
QRRGYKNHFG QSLHEPLSLQ KMDEEKFKLN AASTNNPQFD ATHDLVKPTE 100  
SVI SFLEVLRF RFI RPYAAVG TVLCI ASMEL LTVEKLSDFS PLFFMKVLQA 150  
LVGAMFMQMW VCGI **NQIDI ELDKI** NKPSL PLASGELSMT TAI TVSALSA 200  
IMFSI GWIA SPALFVGFVG WFWGTAYSA NLPWLRWKRF PLTSAFYMLC 250  
SRALWPIGY YLHMQKSIHG GSALLSRPIL FAVGMLSAFC I STIFF**KDIP** 300  
**DI EGD** RMHGI KSLAITLGEK RTFWVCI WIL EIA YVAAAFF GATSPI TVSK 350  
YITVI SHLAM ALALWTRAKS TDVKNKDAVQ SMYFLVQLF FAEYGLIALV 400  
R 401

**b**

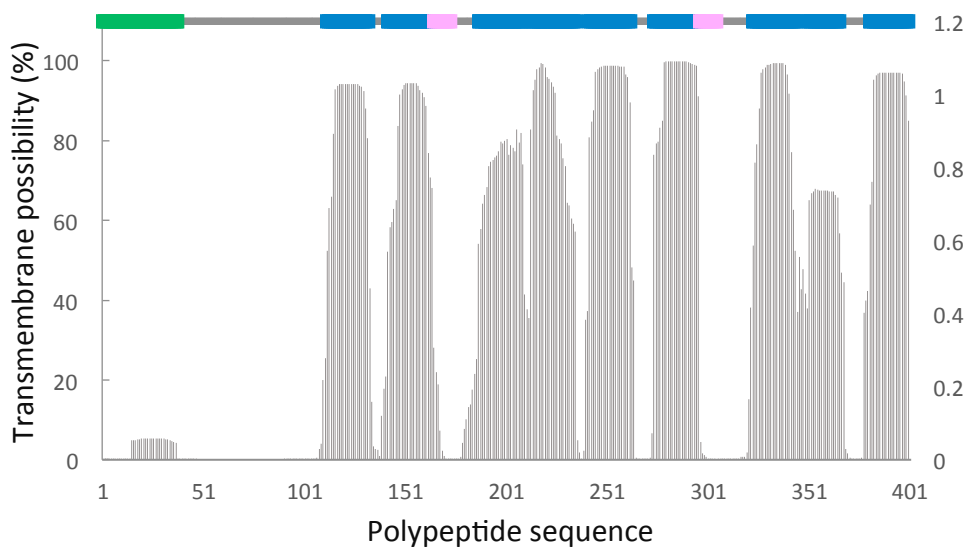

**Supplementary Figure 3. *In silico* analysis of the AcPT1 polypeptide**

- Polypeptide sequence of AcPT1. The two aspartate-rich motifs and the transit peptide predicted by the ChloroP program are shown in pink and green boxes, respectively.
- Transmembrane regions of AcPT1 predicted by the TMHMM program. Amino acids with high transmembrane possibilities (> 50%) are shown in blue as components of transmembrane regions, together with the aspartate-rich motifs (pink bars) and the predicted transit peptide (green bar).

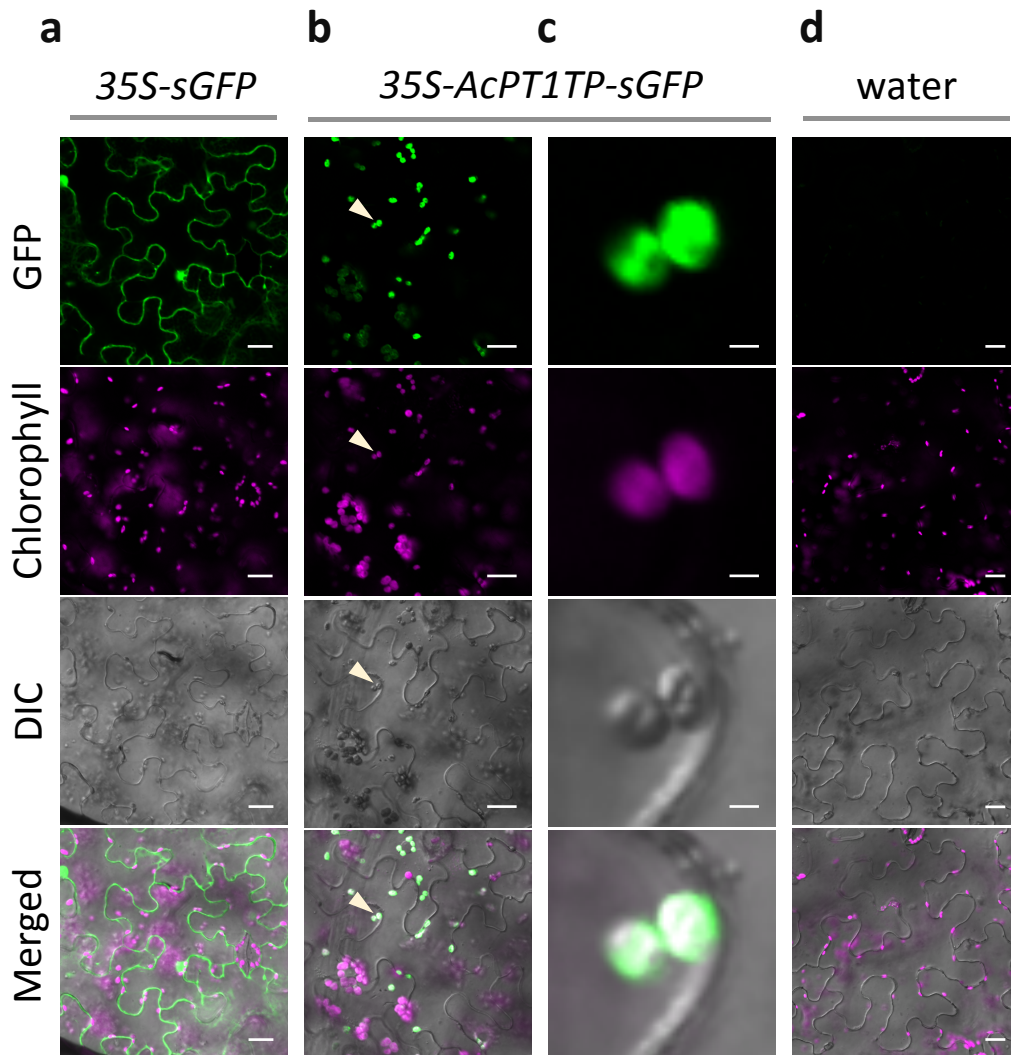

**Supplementary Figure 4. Microscopic investigation of AcPT1TP-sGFP expressed in *N. benthamiana* epidermal cells**

**a – c.** *sGFP* (**a**) and *AcPT1TP-sGFP* (**b** and **c**) were transiently expressed in epidermal cells of *N. benthamiana* leaves by agroinfiltration. **c.** Regions indicated by white arrowheads in **b** are enlarged. **d.** Water was infiltrated into the leaves as a negative control. The images show GFP signaling, chlorophyll autofluorescence, DIC, and their merged image. For merging, contrast of images is unbiasedly adjusted with magenta used as a pseudo-color for the chlorophyll signal. Bars represent 20  $\mu\text{m}$  (**a**, **b**, and **d**) and 2  $\mu\text{m}$  (**c**).

**a**

**Drupanin standard**

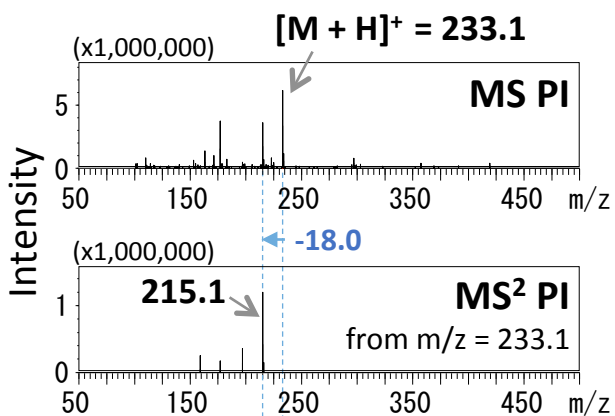

**Artepillin C standard**

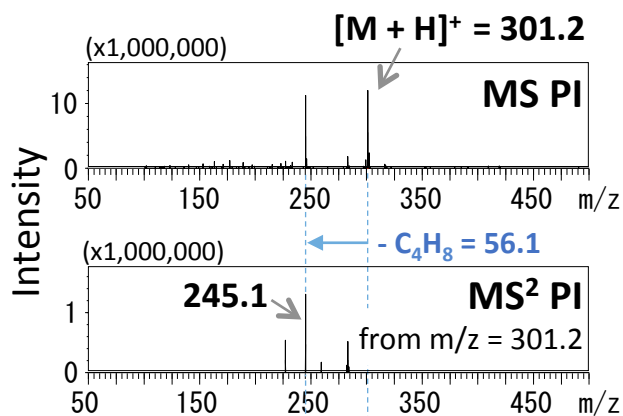

**b**

**Product 1**

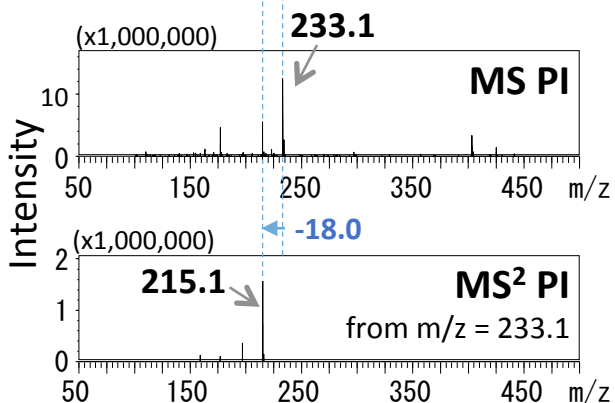

**Product 2**

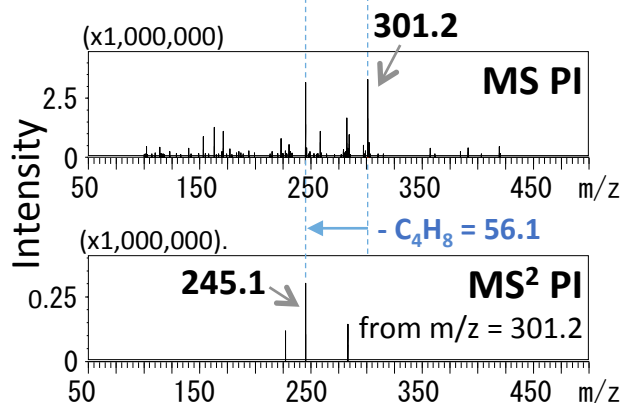

**Supplementary Figure 5. MS-based identification of enzymatic reaction products in *p*-coumaric acid dimethylallyltransferase assay of AcPT1**

MS and MS<sup>2</sup> spectra of standard specimens (a) and reaction products (b) detected in the positive ion mode.

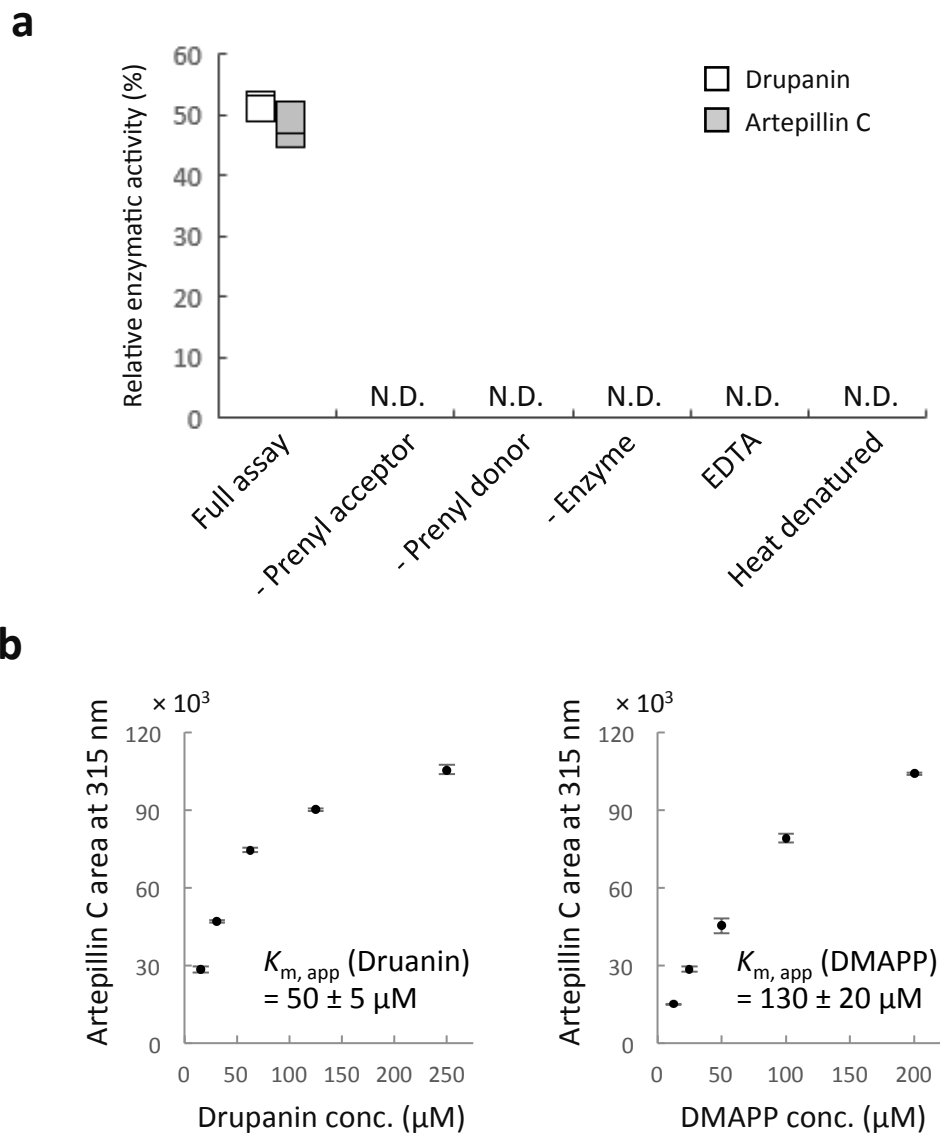

**Supplementary Figure 6. Detailed enzymatic properties of AcPT1**

- a.** Negative control reactions for the *p*-coumaric acid dimethylallyltransferase activity of AcPT1. Shown are overnight reactions without *p*-coumaric acid (- prenyl acceptor), DMAPP (- prenyl donor), or microsomes (- enzyme), and the addition of EDTA instead of MgCl<sub>2</sub> (EDTA) and the use of heat-denatured enzyme (Heat denatured) were also tested. The sum of the averages of produced drupanin and artepillin C in the full assay condition was set at 100%. Values (n = 3 independent experiments) are shown as box plots (center line, median; box limits, first and third quartiles or minimum and maximum).
- b.** Kinetic analysis of AcPT1 using drupanin and DMAPP as substrate pair. The reaction time was shortened to 20 min to calculate apparent  $K_m$  values for drupanin and DMAPP. Values are means  $\pm$  standard errors (n = 3 independent experiments).

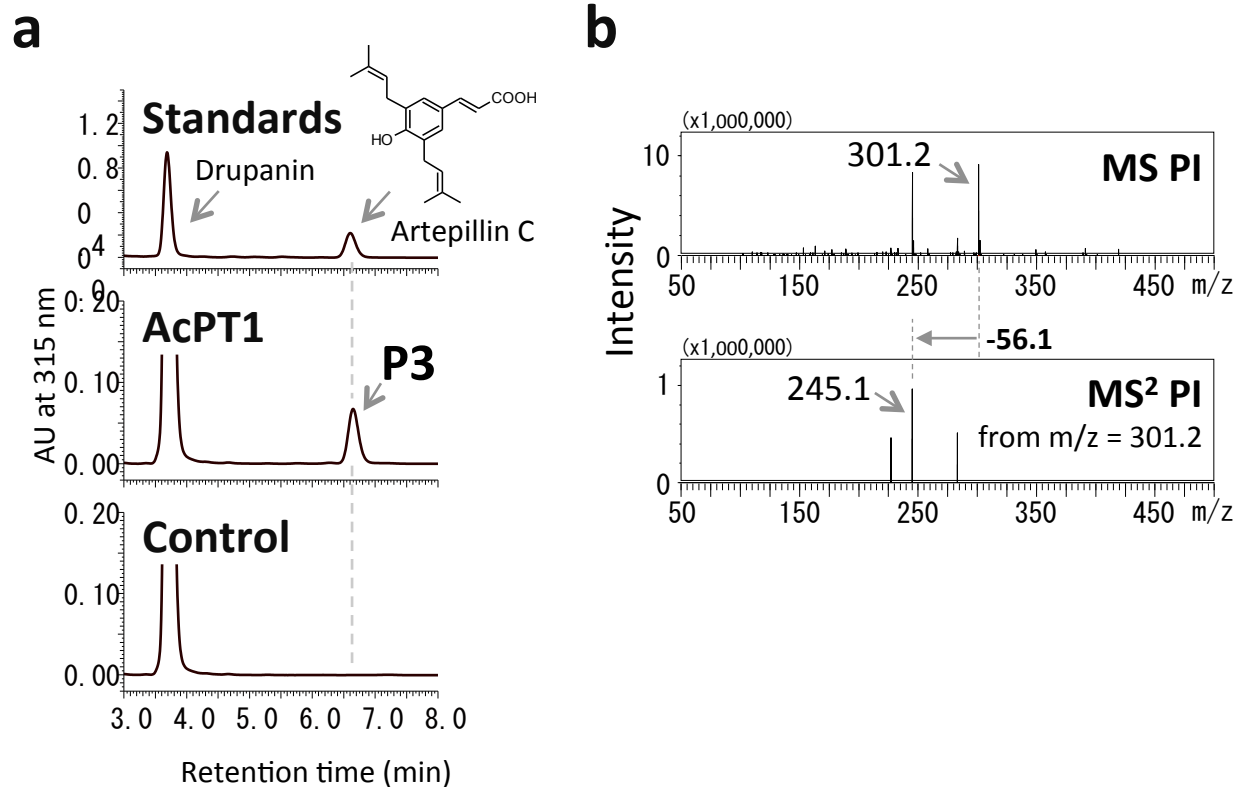

**Supplementary Figure 7. LC/MS analysis of enzymatic reaction mixtures of AcPT1 in substrate specificity test**

**a and b.** UV chromatogram of a drupanin dimethylallyltransferase reaction mixture with AcPT1 (**a**), and MS and MS<sup>2</sup> spectra of this reaction product, P3 (**b**).

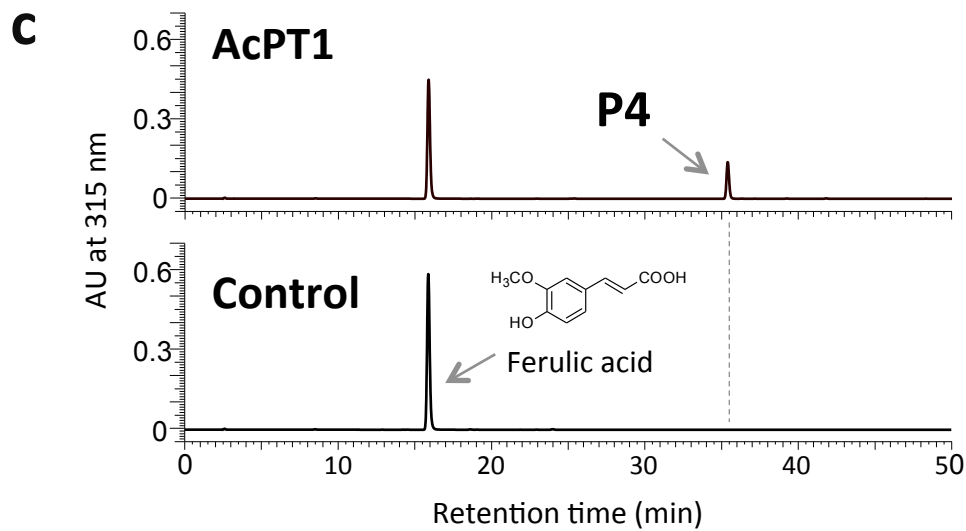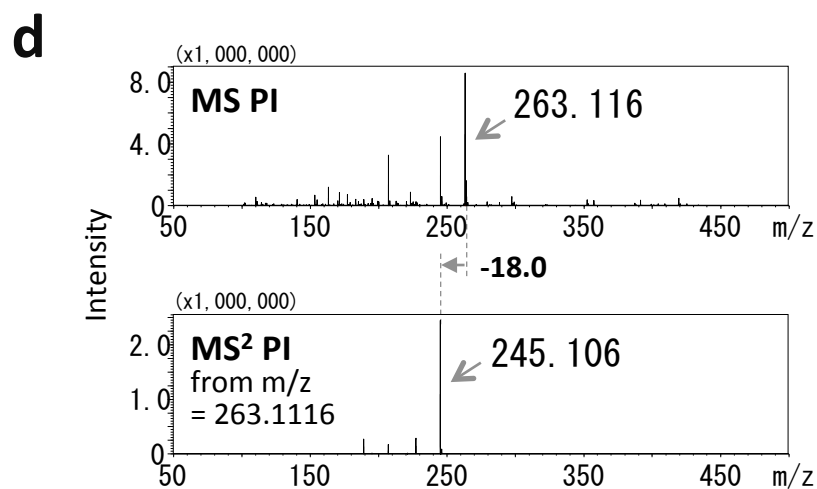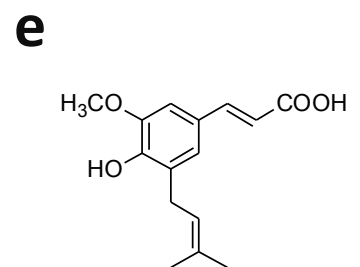

Exact mass = 262.121

**Supplementary Figure 7. LC/MS analysis of enzymatic reaction mixtures of AcPT1 in substrate specificity test - *continued***

**c - e.** UV chromatogram of ferulic acid dimethylallyltransferase reaction mixture with AcPT1 (**c**), MS and MS<sup>2</sup> spectra of this reaction product, P4 (**d**), and its predicted chemical structure (**e**).



**f**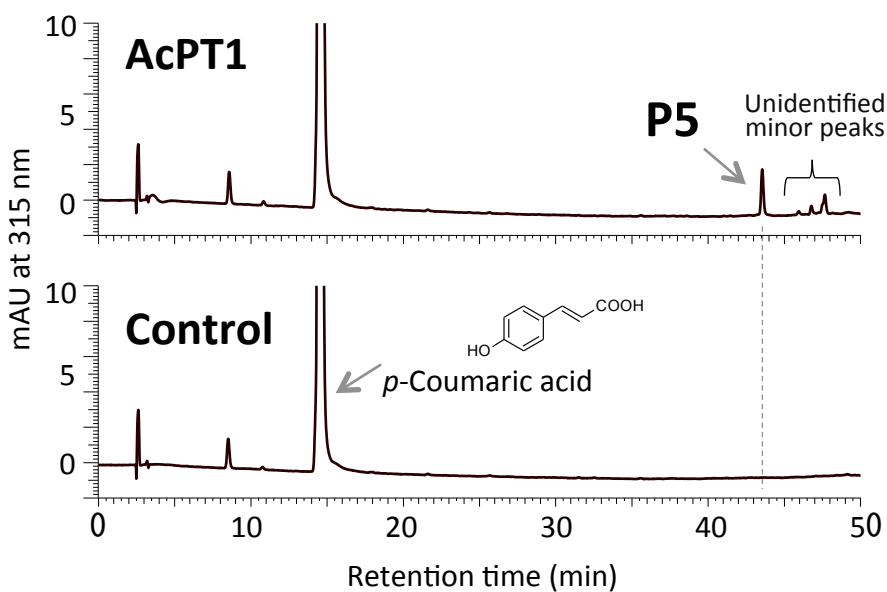**gg**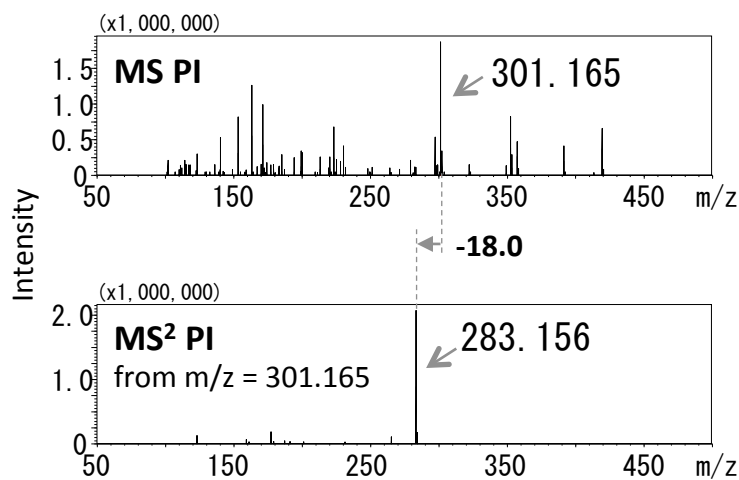**h**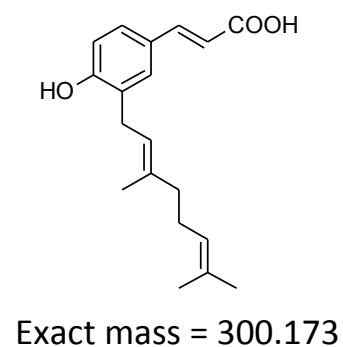

**Supplementary Figure 7. LC/MS analysis of enzymatic reaction mixtures of AcPT1 in substrate specificity test - *continued***

**f - h.** UV chromatogram of *p*-coumaric acid geranyltransferase reaction mixture with AcPT1 (**f**), MS and MS<sup>2</sup> spectra of the reaction product 5 (**g**), and its predicted chemical structure (**h**).

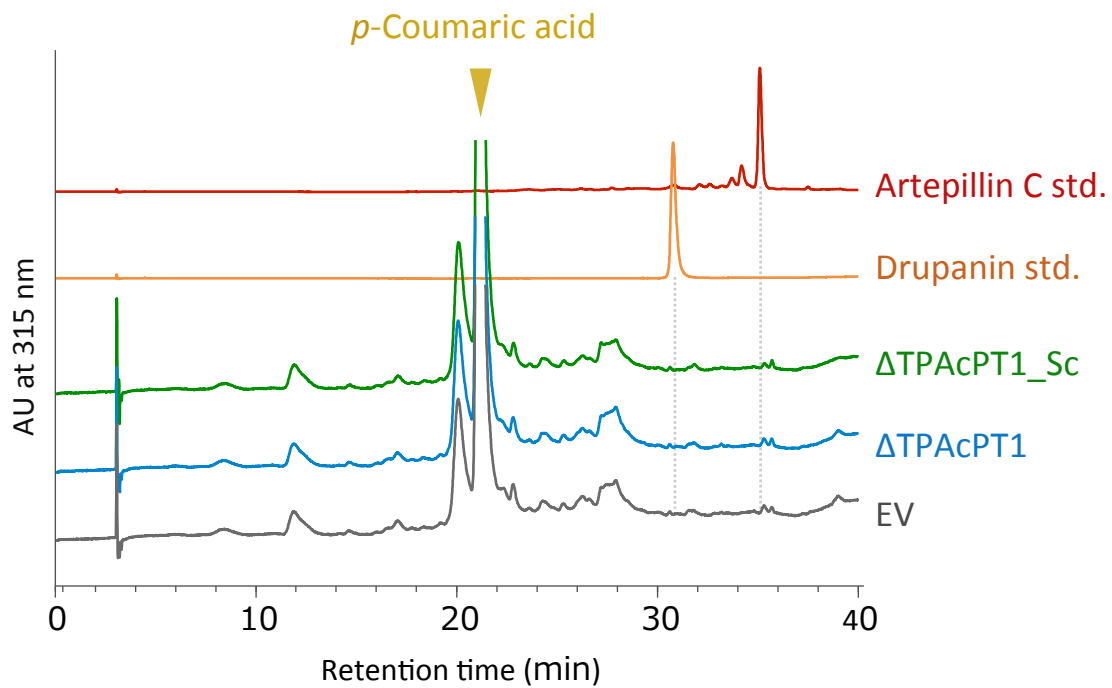

**Supplementary Figure 8. UV chromatograms of medium fractions from the  $\Delta$ TPAcPT1 transformants of the yeast COUM11 strain**

Plasmids containing *ATPacPT1* and *ATPacPT1\_Sc* were introduced into the yeast COUM11 strain engineered to produce *p*-coumaric acid by introduction of *PAL*, *C4H*, and *CPR*. Twenty-four hours after galactose treatment to induce expression of all foreign genes, phenolic compounds were extracted from the media of these yeast cultures and analyzed by HPLC.

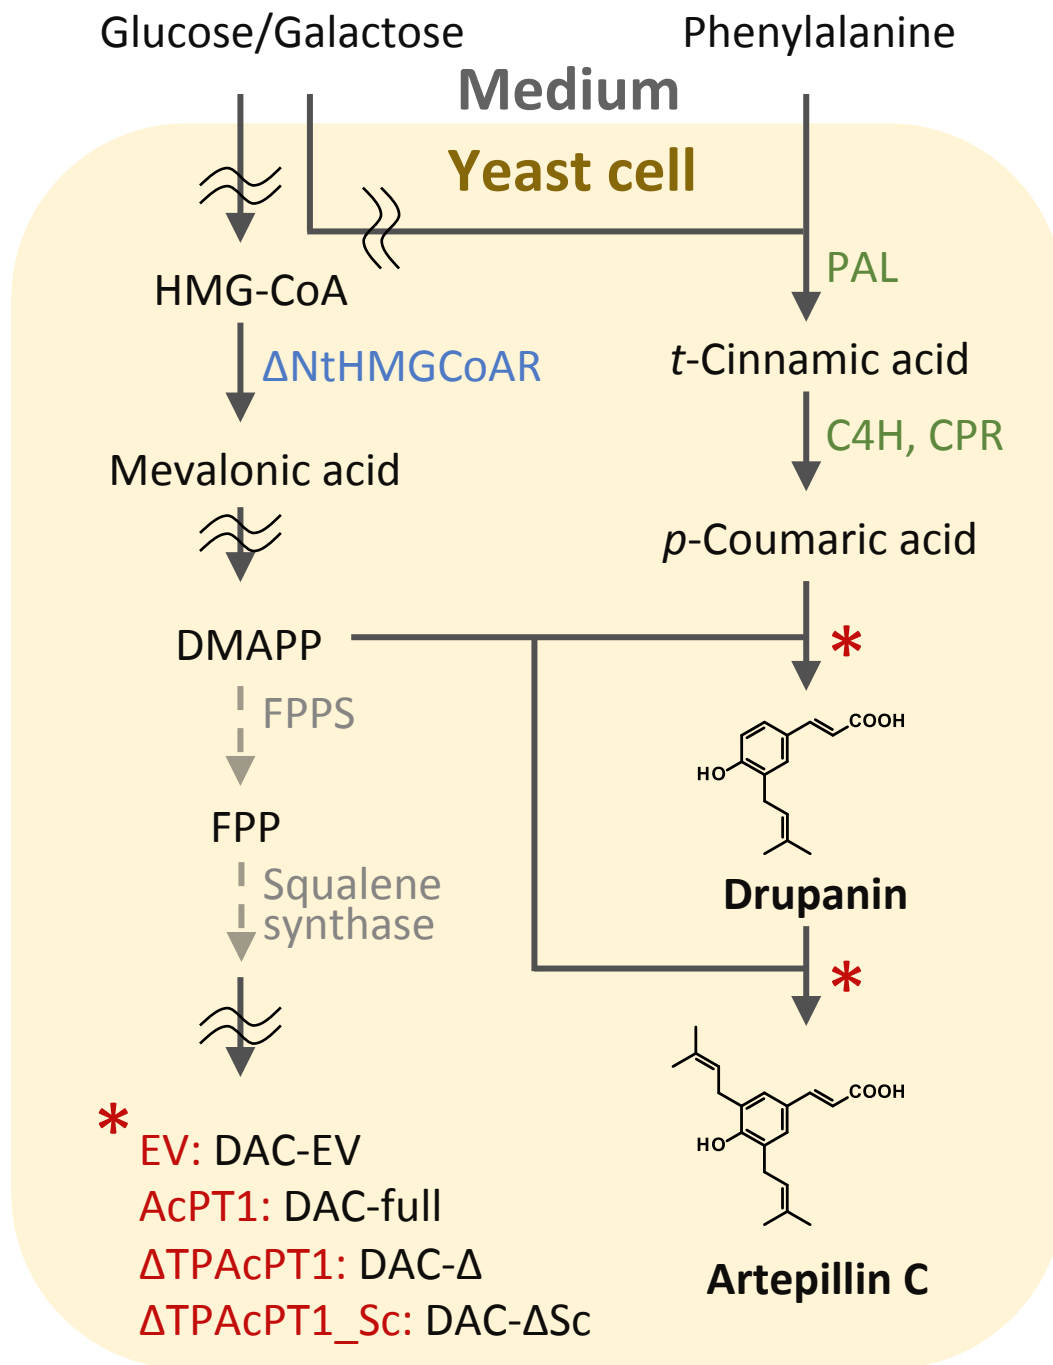

### Supplementary Figure 9. Metabolic design of DAC yeast strains

The DD104 strain with a large DMAPP pool due to mutations in endogenous *FPPS* and *squalene synthase* was used as an expression host. *Truncated HMGCoA Reductase* ( $\Delta NtHMGCoAR$ ), *PAL*, *C4H*, and *CPR* were introduced into DD104 to increase quantities of AcPT1 substrates. The transformant was further genetically modified by pESC-His-EV, pESC-His-AcPT1, pESC-His- $\Delta TPAcPT1$  (a truncated CDS lacking its transit peptide), and pESC-His- $\Delta TPAcPT1\_Sc$  (a codon-optimized  $\Delta TPAcPT1$  for expression in budding yeast cells) to establish the DAC-EV, DAC-full, DAC- $\Delta$ , and DAC- $\Delta Sc$  strains, respectively. All the transgenes were expressed under the control of galactose-inducible promoters.

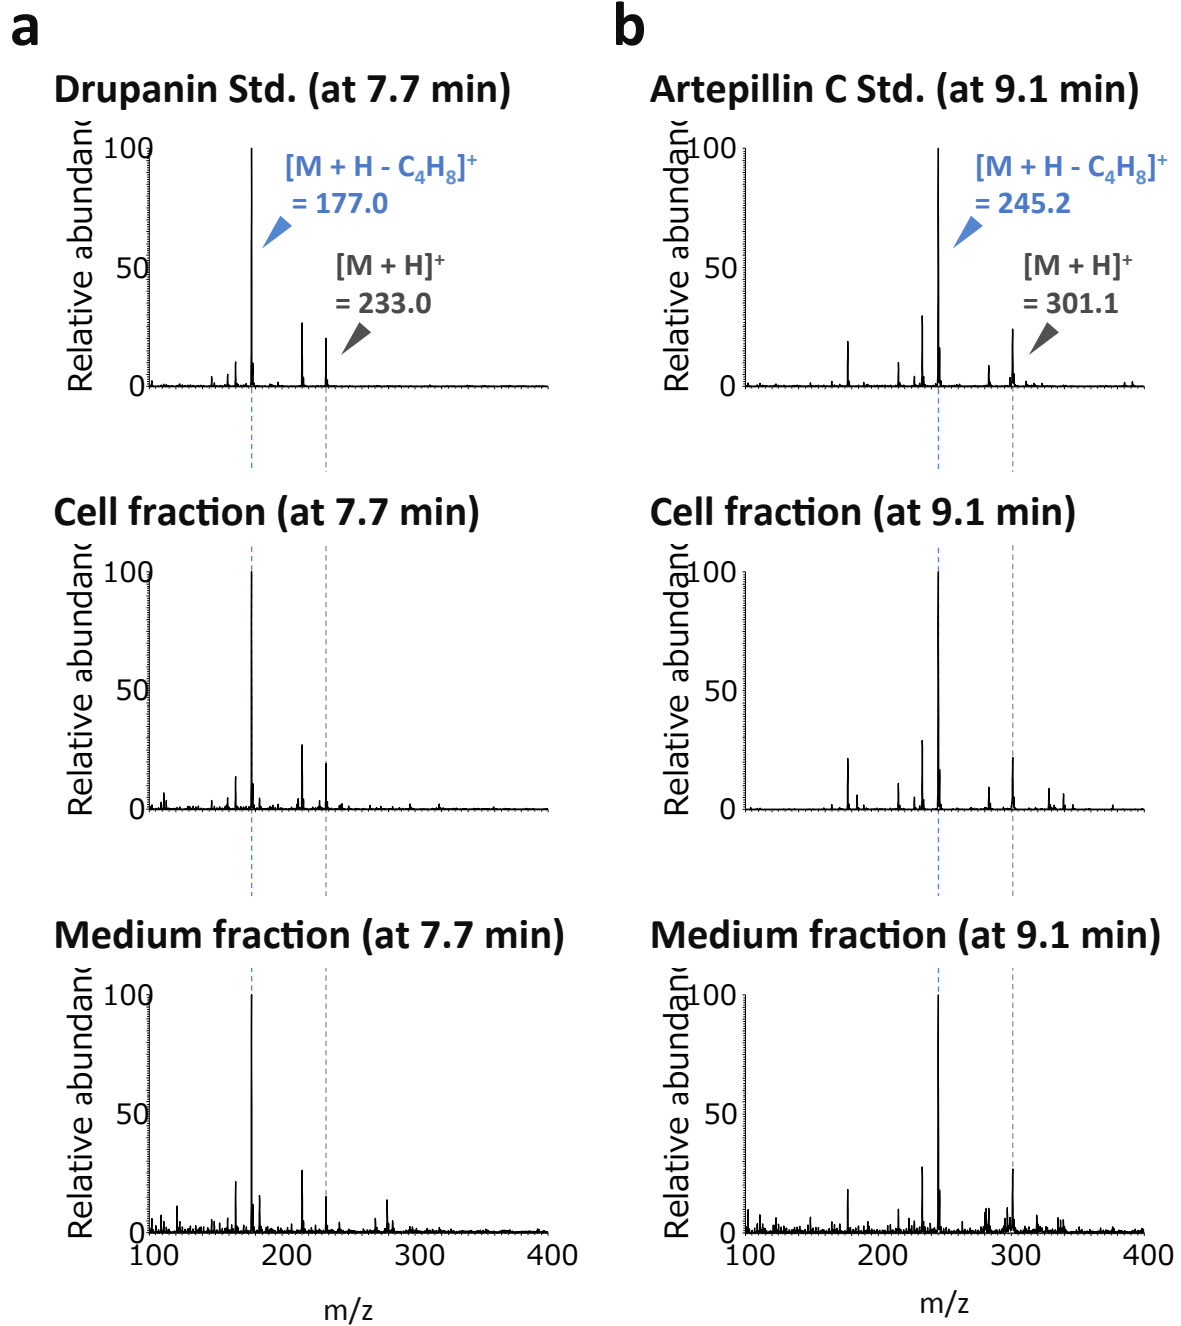

**Supplementary Figure 10. MS spectra of *p*-coumarate derivatives from the DAC- $\Delta$ Sc strain**  
 MS spectra at retention times of 7.7 min (a) and 9.1 min (b) on MS chromatograms of standard specimens of drupanin and artepillin C, and extracts from the DAC- $\Delta$ Sc culture.

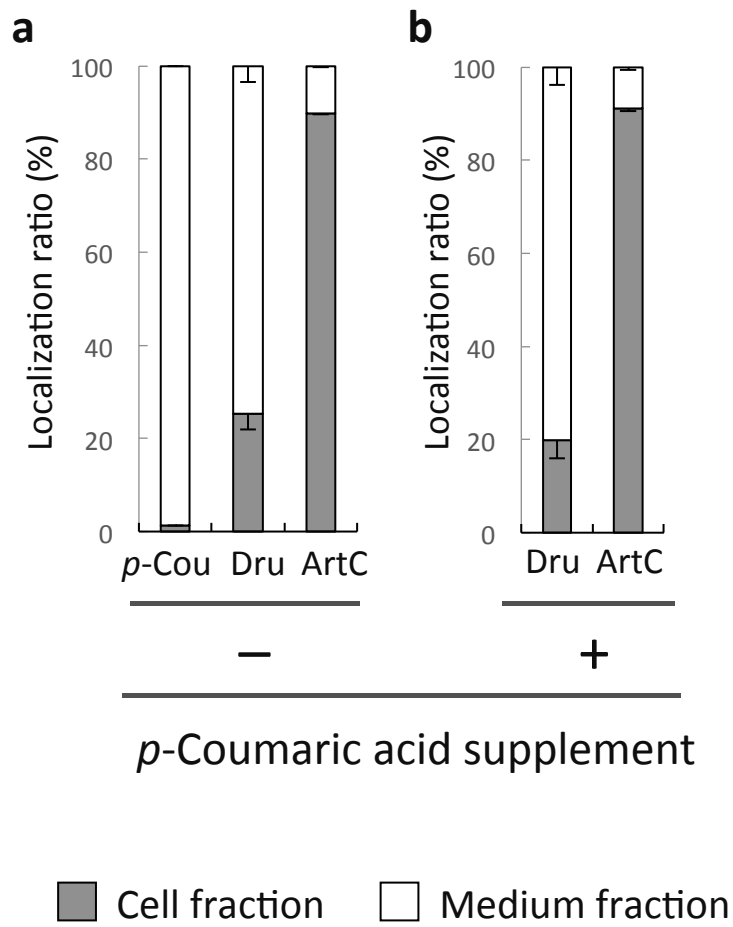

**Supplementary Figure 11. Proportion of produced phenylpropane derivatives in DAC- $\Delta$ Sc cultures**  
 Proportion of *p*-coumaric acid (only for **a**), drupanin and artepillin C in cell and medium fractions of DAC- $\Delta$ Sc cultures without (**a**) and with (**b**) *p*-coumaric acid administration. Values are means  $\pm$  standard errors (n = 3 independent experiments).

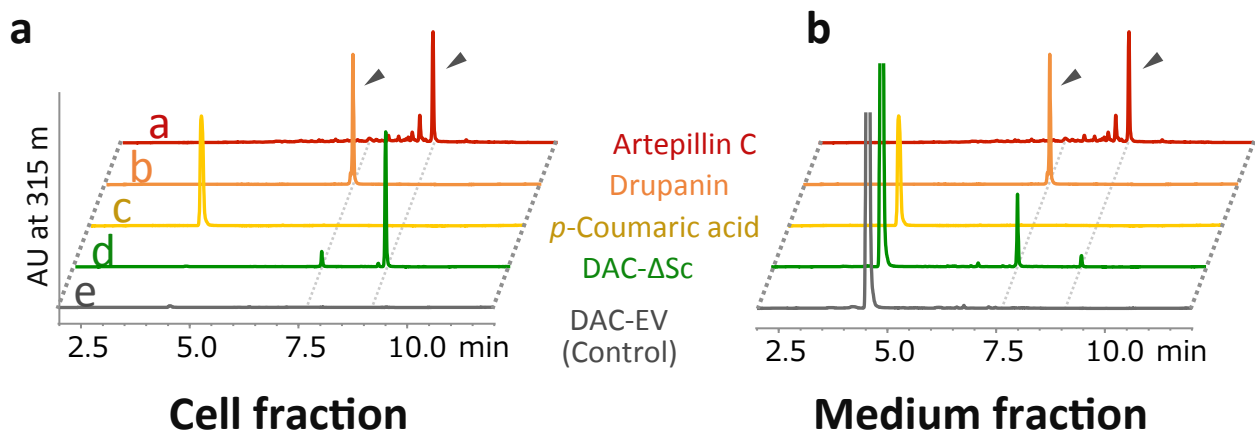

**Supplementary Figure 12. UV chromatograms of extracts of the DAC-ΔSc strain supplemented with *p*-coumaric acid**

Cell (**a**) and medium (**b**) fractions were collected by centrifugation after galactose induction in the presence of 1.0 mM of *p*-coumaric acid. All chromatograms are shown on a comparative scale, except for standards.

## Supplementary Table 1. Primers used in this work

| Primer name                        | Sequence (5' – 3' )                  |
|------------------------------------|--------------------------------------|
| AcPT1_5'UTR_Fw                     | TTTTCTTCAGGGTTGAATTCTTG              |
| AcPT1_3'UTR_Rv                     | ATGTCGGGTTGTTCTTCACC                 |
| AcPT1_qRTPCR_Fw                    | CCATGGAGGATCCGCATTAC                 |
| AcPT1_qRTPCR_Rv                    | ATTCCATGCATCCGATCTCC                 |
| Ac26SrRNA_Fw                       | GGTGCGAGTTCTATCGGGTA                 |
| Ac26SrRNA_Rv                       | CACTTGGAGCTCTCGATTCC                 |
| AcPT1TP_Fw                         | CACCATGGGCGTCTCTAACAGTGG             |
| AcPT1TP_Rv                         | AAATTGCGCAGAGACATTAT                 |
| AcPT1_TOPO_Fw                      | CACCATGGGCGTCTCTAACAGTGGG            |
| AcPT1_TOPO_Rv                      | TCAGCGCACAAGCGCGATAA                 |
| $\Delta$ NtHMGC <sub>oAR</sub> _Fw | AAGCGGCCGCATGACTGCAGACCAATTGGTG      |
| $\Delta$ NtHMGC <sub>oAR</sub> _Rv | GCTTAATTAATTAGGATTTAATGCAGGTGACG     |
| CPR_Fw                             | AAAAAACCCCGGATCATGCAATCATCAAGCAGCTC  |
| CPR_Rv                             | ACCAAGCTTACTCGATTACCATAACATCACGCAGAT |
| $\Delta$ TP-AcPT1_Sc_EcoRI_Fw      | GCGAATTCATGCAGAGAAGAGGTTACAA         |
| $\Delta$ TP-AcPT1_Sc_SacI_Rv       | CGGAGCTCTCATCTAACCAAAGCAATCA         |
| AcPT1_EcoRI_Fw                     | AAGAATTCATGGCGTCTCTAACAGTGG          |
| AcPT1_SacI_Rv                      | AAGAGCTCTCAGCGCACAAGCGC              |
| $\Delta$ TP-AcPT1_EcoRI_Fw         | AAGAATTCATGCAACGAAGAGGTTATAAAAATCATT |

## Supplementary Table 2. Primary metabolism-related PTs used in phylogenetic analysis

| PT member                                    | Plant species               | Protein ID     |
|----------------------------------------------|-----------------------------|----------------|
| <b>Tocopherol biosynthesis</b>               |                             |                |
| AtVTE2-1                                     | <i>Arabidopsis thaliana</i> | NP_849984.1    |
| GmVTE2-1                                     | <i>Glycine max</i>          | NP_001241496.1 |
| HvVTE2-1                                     | <i>Hordeum vulgare</i>      | BAJ97902.1     |
| LaVTE2-1                                     | <i>Lactuca sativa</i>       | ACN78585.1     |
| OsVTE2-1                                     | <i>Oryza sativa</i>         | XP_015644510.1 |
| TaVTE2-1                                     | <i>Triticum aestivum</i>    | ABB70123.1     |
| ZmVTE2-1                                     | <i>Zea mays</i>             | ACG45339.1     |
| <b>Plastoquinone biosynthesis</b>            |                             |                |
| AtVTE2-2                                     | <i>Arabidopsis thaliana</i> | NP_001078138   |
| GmVTE2-2                                     | <i>Glycine max</i>          | NP_001237900   |
| HaVTE2-2                                     | <i>Helianthus annuus</i>    | XP_022000593.1 |
| OsVTE2-2                                     | <i>Oryza sativa</i>         | XP_015646905.1 |
| ZmVTE2-2                                     | <i>Zea mays</i>             | NP_001146703.1 |
| <b>Phylloquinone biosynthesis</b>            |                             |                |
| AtABC4                                       | <i>Arabidopsis thaliana</i> | NP_001117518.1 |
| GmABC4                                       | <i>Glycine max</i>          | XP_003532605.1 |
| HaABC4                                       | <i>Helianthus annuus</i>    | XP_021989185.1 |
| OsABC4                                       | <i>Oryza sativa</i>         | NP_001049226.1 |
| ZmABC4                                       | <i>Zea mays</i>             | NP_001152170.1 |
| <b>Chrolophyll biosynthesis</b>              |                             |                |
| AtATG4                                       | <i>Arabidopsis thaliana</i> | NP_190750.1    |
| GmATG4                                       | <i>Glycine max</i>          | NP_001239633.1 |
| HaATG4                                       | <i>Helianthus annuus</i>    | XP_021970771.1 |
| OsATG4                                       | <i>Oryza sativa</i>         | ABO31092.1     |
| ZmATG4                                       | <i>Zea mays</i>             | NP_001142204.1 |
| <b>Heam <math>\alpha</math> biosynthesis</b> |                             |                |
| AtCOX10                                      | <i>Arabidopsis thaliana</i> | NP_566019.1    |
| GmCOX10                                      | <i>Glycine max</i>          | XP_003556552.1 |
| HaCOX10                                      | <i>Helianthus annuus</i>    | XP_022025736.1 |
| OsCOX10                                      | <i>Oryza sativa</i>         | EEC70799.1     |
| ZmCOX10                                      | <i>Zea mays</i>             | AFW89544.1     |
| <b>Ubiquinone biosynthesis</b>               |                             |                |
| AtPPT1                                       | <i>Arabidopsis thaliana</i> | NP_567688      |
| GmPPT                                        | <i>Glycine max</i>          | XP_006602724.1 |
| HaPPT                                        | <i>Helianthus annuus</i>    | XP_021993218.1 |
| OsPPT1                                       | <i>Oryza sativa</i>         | BAE96574.1     |
| ZmPPT                                        | <i>Zea mays</i>             | NP_001148558.1 |



## Supplementary Table 3. Specialized metabolism-related PTs used in phylogenetic analysis

| PT member         | Plant species                | Protein ID     |
|-------------------|------------------------------|----------------|
| <b>Asteraceae</b> |                              |                |
| AcPT1             | <i>Artemisia capillaris</i>  | LC425153       |
| <b>Polaceae</b>   |                              |                |
| HvHGGT            | <i>Hordeum vulgare</i>       | AAP43911.1     |
| OsHGGT            | <i>Oryza sativa</i>          | AAP43913.1     |
| TaHGGT            | <i>Triticum aestivum</i>     | AAP43912.1     |
| ZmHGGT            | <i>Zea mays</i>              | XP_008659772.1 |
| <b>Rutaceae</b>   |                              |                |
| CIPT1             | <i>Citrus limon</i>          | BAP27988.1     |
| <b>Apiaceae</b>   |                              |                |
| PcPT              | <i>Petroselinum crispum</i>  | BAO31627.1     |
| PsPT1             | <i>Pastinaca sativa</i>      | AJW31563.1     |
| PsPT2             | <i>Pastinaca sativa</i>      | AJW31564.1     |
| <b>Fabaceae</b>   |                              |                |
| AhR3'DT-1         | <i>Arachis hypogaea</i>      | AQM74173.1     |
| AhR3'DT-2         | <i>Arachis hypogaea</i>      | AQM74174.1     |
| AhR3'DT-3         | <i>Arachis hypogaea</i>      | AQM74175.1     |
| AhR3'DT-4         | <i>Arachis hypogaea</i>      | AQM74176.1     |
| AhR4DT-1          | <i>Arachis hypogaea</i>      | AQM74172.1     |
| GmC4DT            | <i>Glycine max</i>           | BAW32575.1     |
| GmG2DT            | <i>Glycine max</i>           | BAW32578.1     |
| GmG4DT            | <i>Glycine max</i>           | NP_001235990   |
| GmIDT1            | <i>Glycine max</i>           | BAW32576.1     |
| GmIDT2            | <i>Glycine max</i>           | BAW32577.1     |
| GuA6DT            | <i>Glycyrrhiza uralensis</i> | AIT11912.1     |
| GuILD             | <i>Glycyrrhiza uralensis</i> | AMR58303.1     |
| LaPT1             | <i>Lupinus albus</i>         | AER35706.1     |
| LjG6DT            | <i>Lotus japonicus</i>       | ARV85585.1     |
| SfFPT             | <i>Sophora flavescens</i>    | AHA36633.1     |
| SfG6DT            | <i>Sophora flavescens</i>    | BAK52291.1     |
| SfILD             | <i>Sophora flavescens</i>    | BAK52290.1     |
| SfN8DT-1          | <i>Sophora flavescens</i>    | BAG12671.1     |
| SfN8DT-2          | <i>Sophora flavescens</i>    | BAG12673.1     |
| SfN8DT-3          | <i>Sophora flavescens</i>    | BAK52289.1     |

**Supplementary Table 3. Specialized metabolism-related PTs used in phylogenetic analysis - *continued***

| <b>PT member</b>    | <b>Plant species</b>              | <b>Protein ID</b> |
|---------------------|-----------------------------------|-------------------|
| <b>Moraceae</b>     |                                   |                   |
| CtIDT               | <i>Cudrania tricuspidata</i>      | AJD80983.1        |
| MaIDT               | <i>Morus alba</i>                 | AJD80982.1        |
| <b>Cannabaceae</b>  |                                   |                   |
| HIPT-1              | <i>Humulus lupulus</i>            | BAJ61049.1        |
| HIPT-2              | <i>Humulus lupulus</i>            | AJD80255.1        |
| <b>Hypericaceae</b> |                                   |                   |
| HcPT                | <i>Hypericum calycinum</i>        | ALD84371          |
| <b>Boraginaceae</b> |                                   |                   |
| AePGT               | <i>Arnebia euchroma</i>           | ABD59796.2        |
| AePGT4              | <i>Arnebia euchroma</i>           | ANC67957.1        |
| AePGT6              | <i>Arnebia euchroma</i>           | ANC67959.1        |
| LePGT1              | <i>Lithospermum erythrorhizon</i> | BAB84122.1        |
| LePGT2              | <i>Lithospermum erythrorhizon</i> | BAB84123.1        |
